# Supplementary material
Source: publisher figshare collection journal article supplement (https://karger.figshare.com/ndownloader/files/8712847)
Supplement: Supplementary file 1 [file 8712847]

ONLINE SUPPLEMENT

## Treatment of Aneurysmal Subarachnoid Haemorrhage in Germany: a Nationwide Analysis of the Years 2005-2009

Supplemental Tables

Table S1: Weights for age-standardization (Midyear population of Germany 2007)

| **Age group (years)** | **Weight** |
| --- | --- |
| 0-4 | 4238.18 |
| 5-9 | 4681.81 |
| 10-14 | 4890.67 |
| 15-19 | 5716.39 |
| 20-24 | 5897.77 |
| 25-29 | 6014.52 |
| 30-34 | 5770.28 |
| 35-39 | 7559.20 |
| 40-44 | 8745.01 |
| 45-49 | 8046.76 |
| 50-54 | 6985.87 |
| 55-59 | 6307.85 |
| 60-64 | 5199.50 |
| 65-69 | 6553.83 |
| 70-74 | 4978.13 |
| 75-79 | 3714.88 |
| 80-84 | 2648.28 |
| 85 + | 2051.08 |

Table S2: Coding algorithms for modified Charlson comorbidity index

| **Comorbidities** | **ICD-10-GM** |
| --- | --- |
| Myocardial infarction | I21.0-I21.4, I21.8-I22.1, I22.8, I25.2 |
| Congestive heart failure | I11.0, I11.3, I13.2, I25.5, I42.0, I42.5-I43.2, I43.8, I43.9, I43, I50.0, I50.1, I50.9, I50 |
| Peripheral vascular diseases | I70.0-I70.2, I70.8-I71.9, I70, I71, I77.1, I79.0, I79.2, K55.1, Z95.8, I95.9 |
| Cerebrovascular diseases | G45.0-G45.4, G45.8, G45.9-G46.8, I67.1-I67.9, I68.1, I68.2, I68.8, I69.0-I69.4, I69.8, I69.9, F00.0-F00.2, F00.9, F03, G30.0, G30.1, G30.8, G30.9, G31.1 |
| Pulmonary diseases | I27.8, I27.9, J40, J41.0, J41.1, J41.8, J42, J43.0-J43.2, J43.8, J43.9, J44.0, J44.1, J44.8, J44.9, J45.0, J45.1, J45.8, J45.9, J45, J46, J47, J60, J61, J62.0, J62.8, J62, J63.0-J63.5, J63.8, J63, J64, J65, J66.0, J66.1, J66.2, J66.8, J66, J67.0-J67.9, J67, J68.4, J70.1, J70.3 |
| Rheumatic diseases | M05.0-M05.3, M05.8, M05.9, M05, M06.0-M06.4, M06.8, M06.9, M06, M31.5, M32.0, M32.1, M32.8, M32.9, M32, M33.0, M33.1, M33.9, M33, M34.0, M34.1, M34.8, M34.9, M34, M35.1, M35.3, M36.0 |
| Peptic ulcer disease | K25, M26, M27, M28 |
| Mild liver diseases | B18.0-B18.2, B18.8, B18.9, B18, K70.0-K70.3, K70.9, K71.3-K71.5, K71.7, K73.0-K73.2, K73.8, K73.9, K73, K74.0-K74.6, K74, K76.0, K76.2, K76.4, K76.8, K76.9, Z94.4 |
| Diabetes without complications | E10.0, E10.1, E10.6, E10.8, E10.9, E11.1, E11.6, E11.8, E12.0, E12.1, E12.6, E12.8, E12.9, E13.0, E13.1, E13.6, E13.8, E13.9, E14.1, E14.6, E14.8 |
| Diabetes with complications | E10.3-E10.5, E10.7, E11.2-E11.5, E11.7, E12.2-E12.5, E12.7, E13.2-E13.5, E13.7, E14.2-E14.5, E14.7 |
| Hemi- or paraplegia | G11.4, G80.1, G80.2, G81, G81.0, G81.1, G81.9, G82, G82.0, G82.1-G82.5, G83.0-G83.4, G83.9 |
| Renal diseases | I12.0, I13.1, N03.2-N03.7, N05.3-N05.7, N18.0, N18.8, N18.9, N18, N19, N25.0, Z49.0-Z49.2, Z94.0, Z99.2 |
| Metastatic diseases | C77.1-C77.5, C77.8, C77.9, C77, C78.0-C78.8, C78, C79.0-C79.8, C79, C80 |
| Cancer (without non-melanoma skin cancer) | C00-C09, C10-C19, C20-C29, C30-C39, C40-C43, C45-C49, C50-C59, C60-C69, C70-C76, C81-C89, C90-C97 |
| Moderate or severe liver disease | I85.0, I85.9, I86.4, I98.2, K70.4, K71.1, K72.1, K76.5, K76.6, K76.7 |
| AIDS-HIV | B20.0-B20.9, B20, B21.0-B21.3, B21.7-B21.9, B21, B22.0-B22.2, B22.7, B22, B23.0-B23.2, B23.8, B23, B24 |
